# Supplementary material for: Comprehensive analysis of differentially expressed genes and transcriptional regulation induced by salt stress in two contrasting cotton genotypes
Source: PubMed Central journal article supplement (PMC4169805; doi:10.1186/1471-2164-15-760), 2014-09-05
Supplement: 12864_2014_6456_MOESM1_ESM.pdf [file 12864_2014_6456_MOESM1_ESM.pdf]

# Additional file 1. Summary of *de novo* assembled mRNA-seq transcriptome data

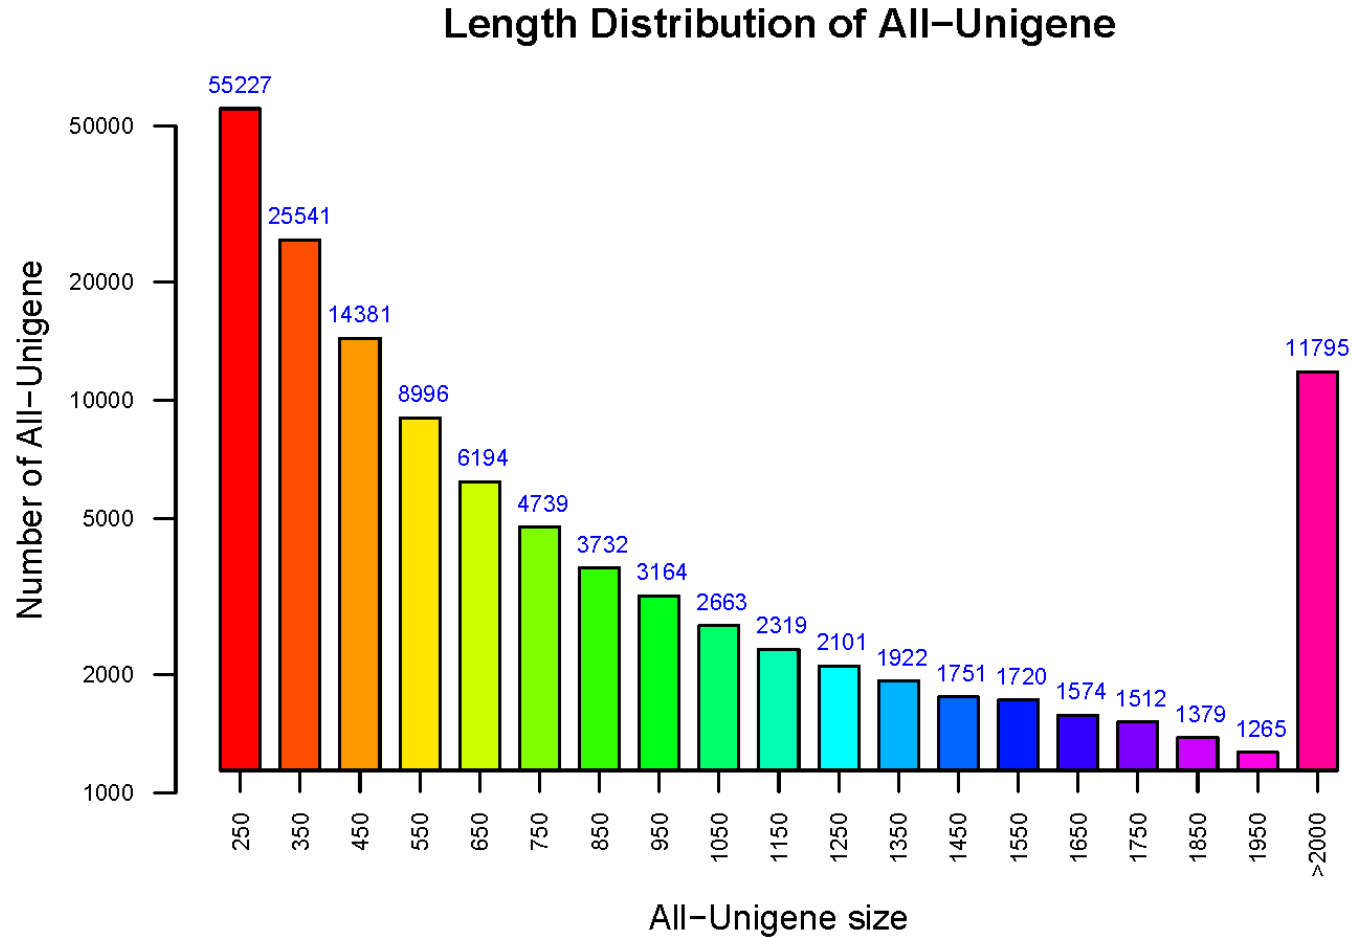

## A. Mapping of the length distribution of all-unigene

## GC Content Frequency Distribution

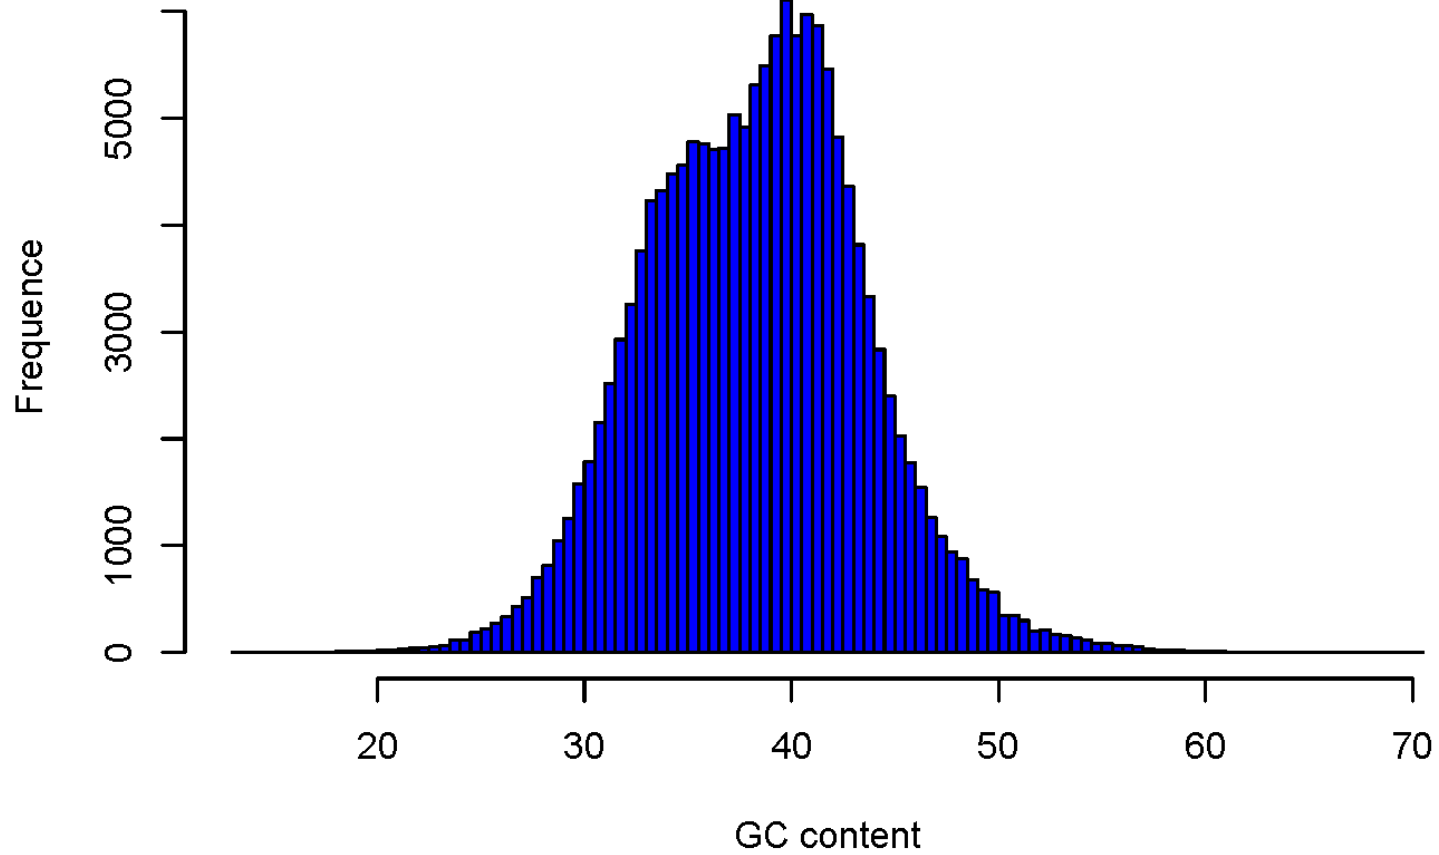

### B. GC content of all unigenes

# Comparison of GO classification

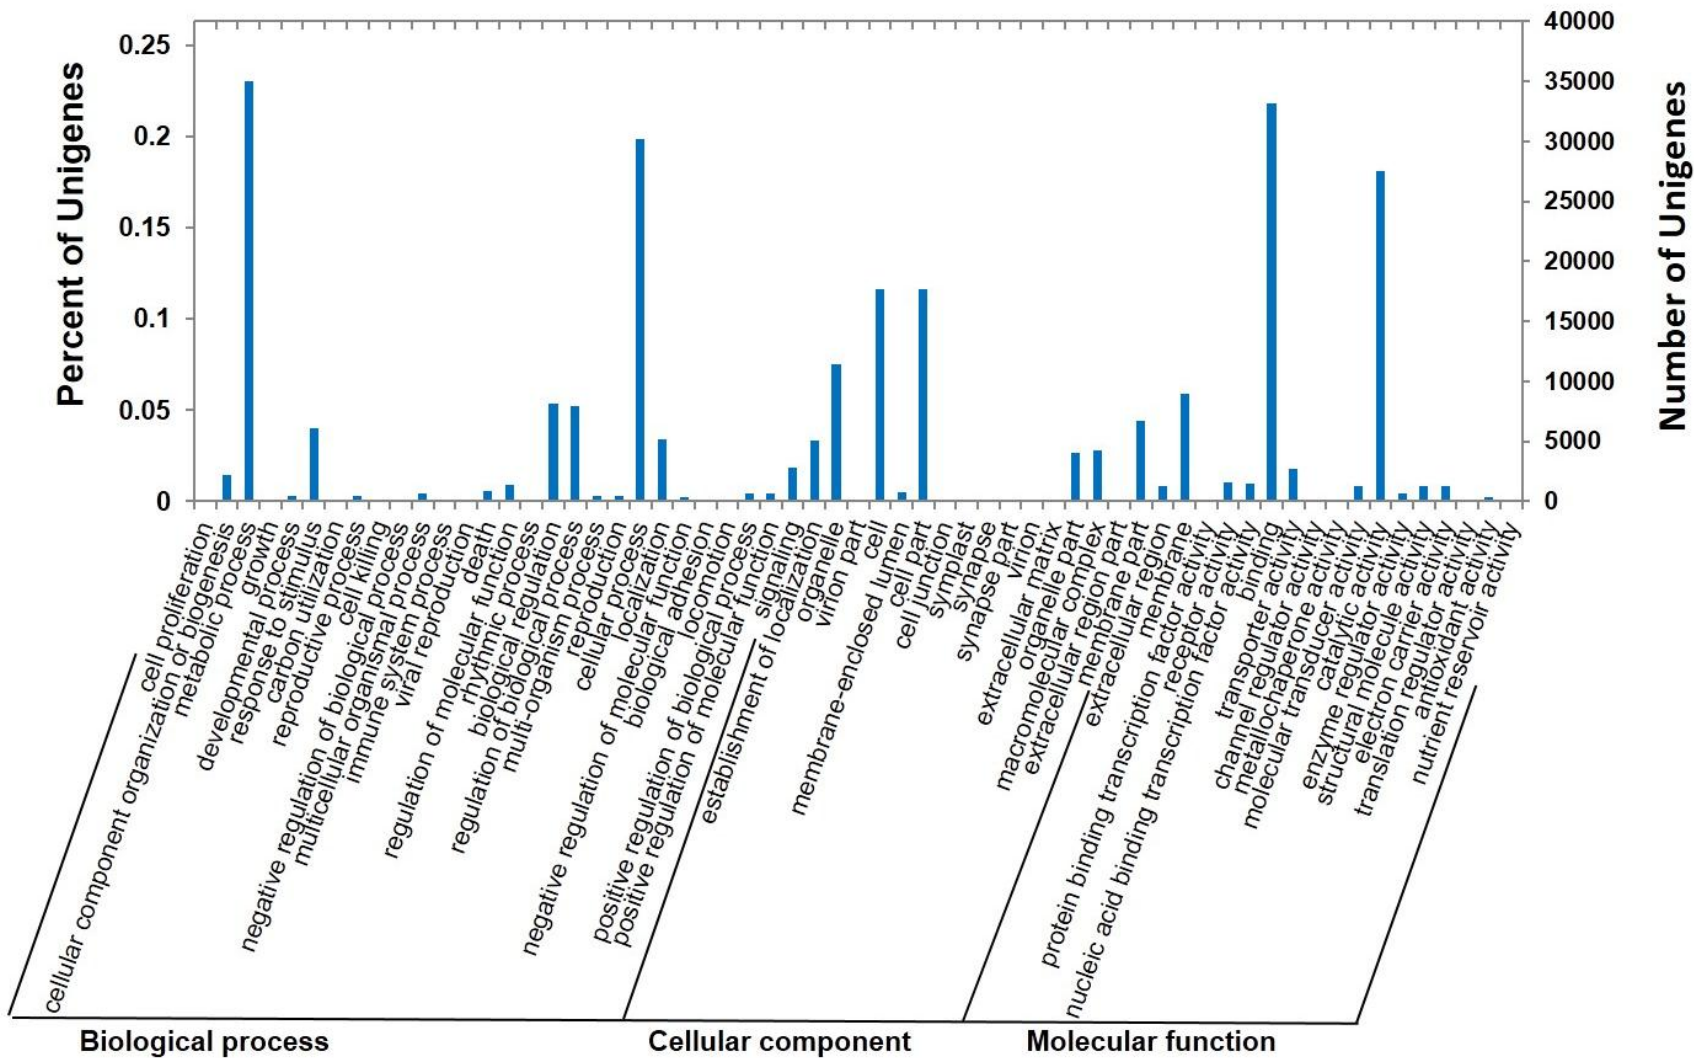

C. Functional classifications of GO annotated unigenes
