# Supplementary material for: Comprehensive analysis of differentially expressed genes and transcriptional regulation induced by salt stress in two contrasting cotton genotypes
Source: PubMed Central journal article supplement (PMC4169805; doi:10.1186/1471-2164-15-760), 2014-09-05
Supplement: 12864_2014_6456_MOESM3_ESM.pdf [file 12864_2014_6456_MOESM3_ESM.pdf]

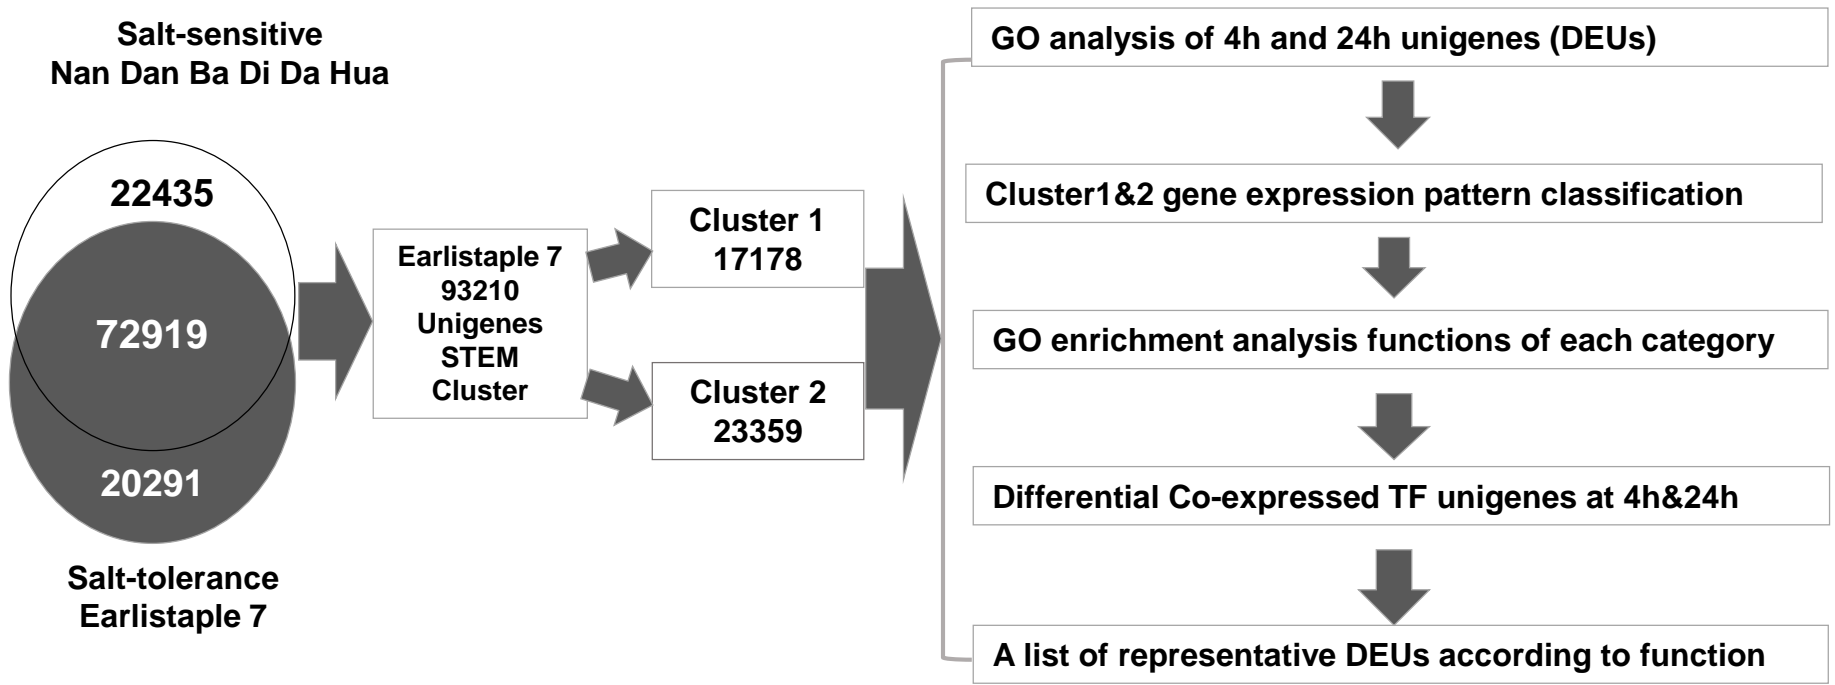

**Additional file 3. Flowchart analysis of the differentially co-expressed unigenes**
