# Supplementary material for: Comprehensive analysis of differentially expressed genes and transcriptional regulation induced by salt stress in two contrasting cotton genotypes
Source: PubMed Central journal article supplement (PMC4169805; doi:10.1186/1471-2164-15-760), 2014-09-05
Supplement: 12864_2014_6456_MOESM6_ESM.pdf [file 12864_2014_6456_MOESM6_ESM.pdf]

# Additional file 6. Summary of small RNA sequencing data

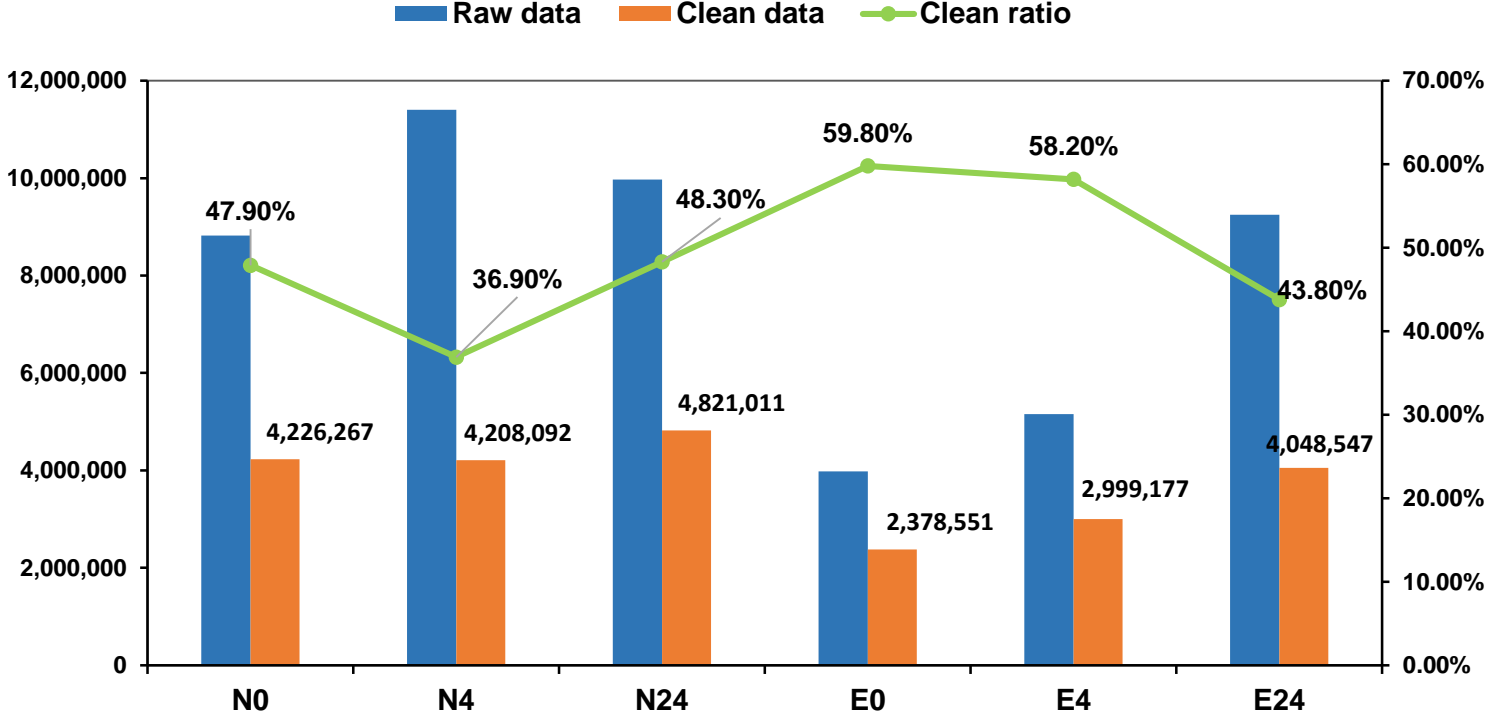

A. Statistical summary of data before and after quality pretreatment

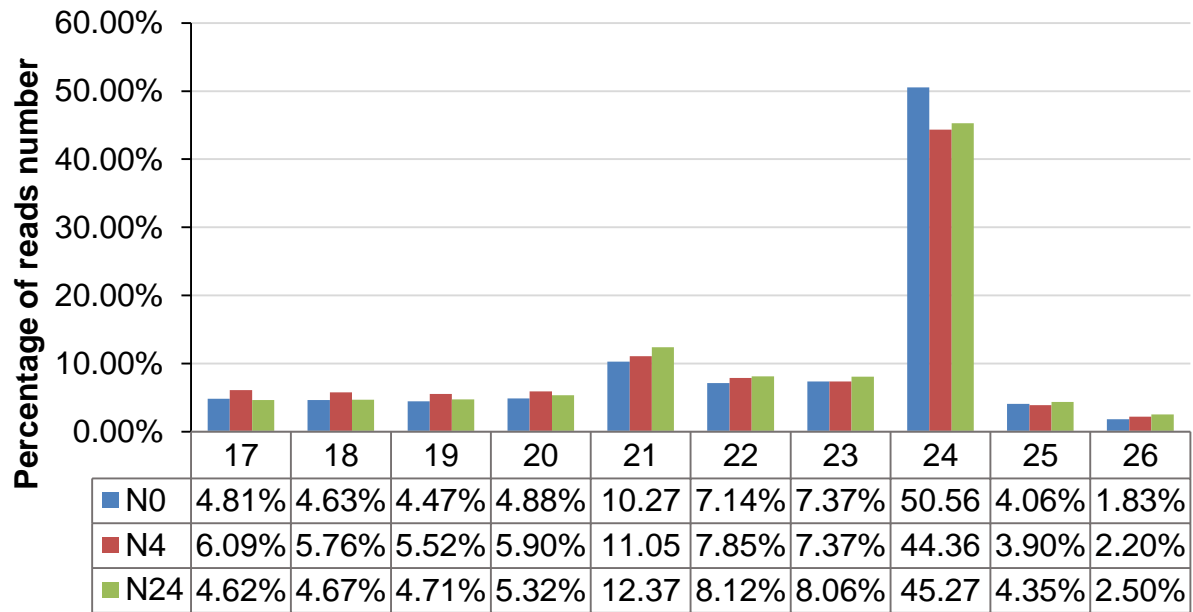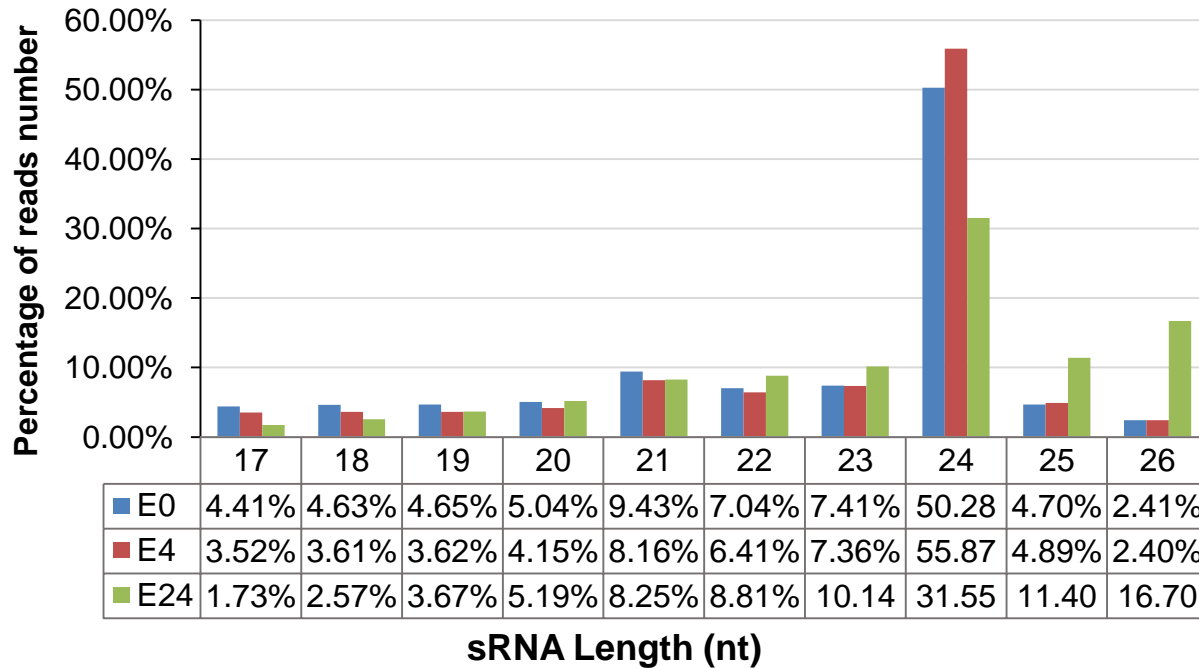

**B. Size distribution of small RNA unique reads (N: above; E: below)**

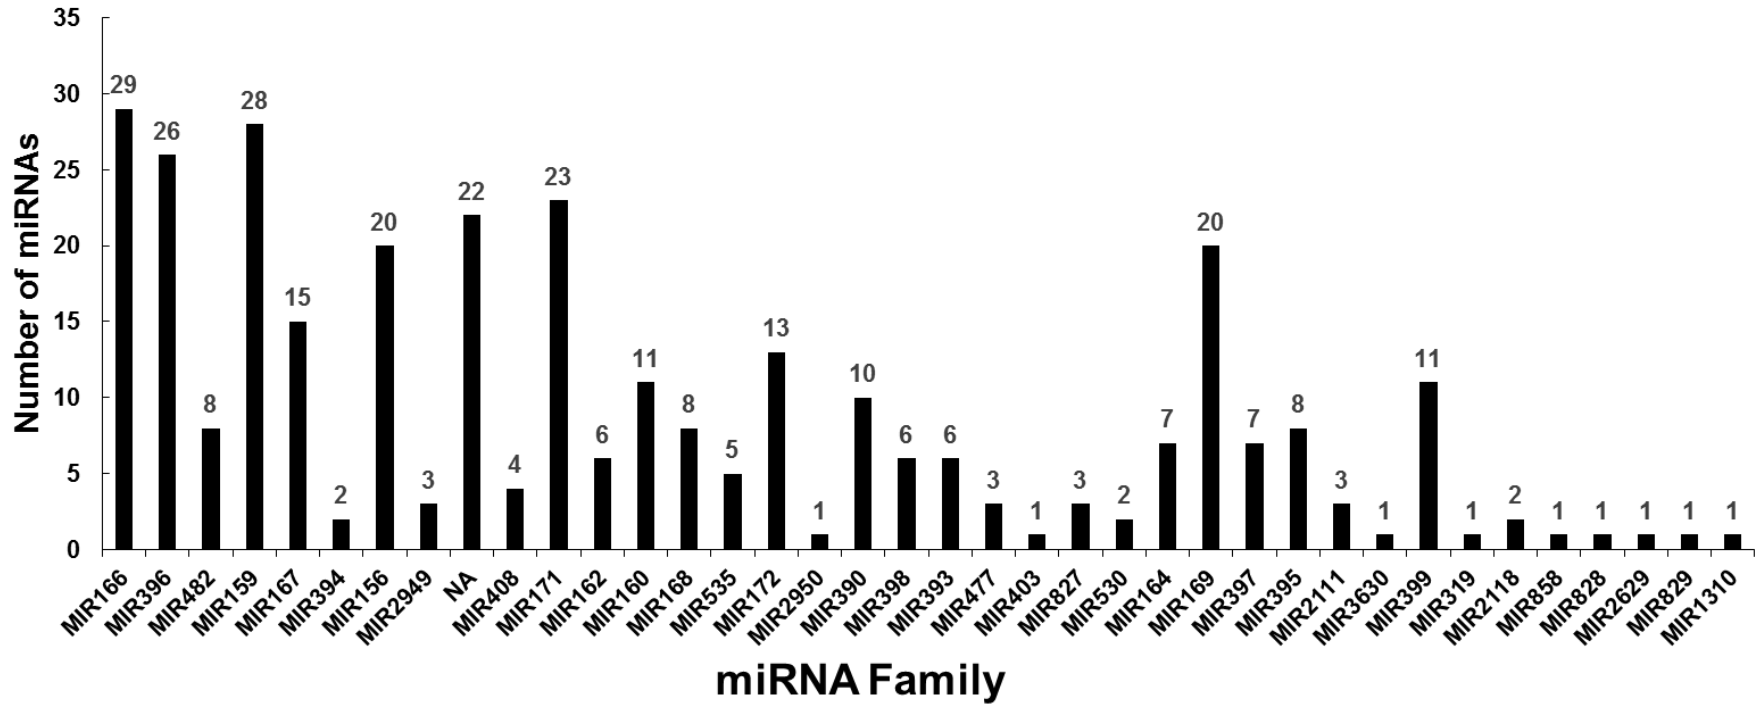

**C. Number of detected family members of each miRNA family**

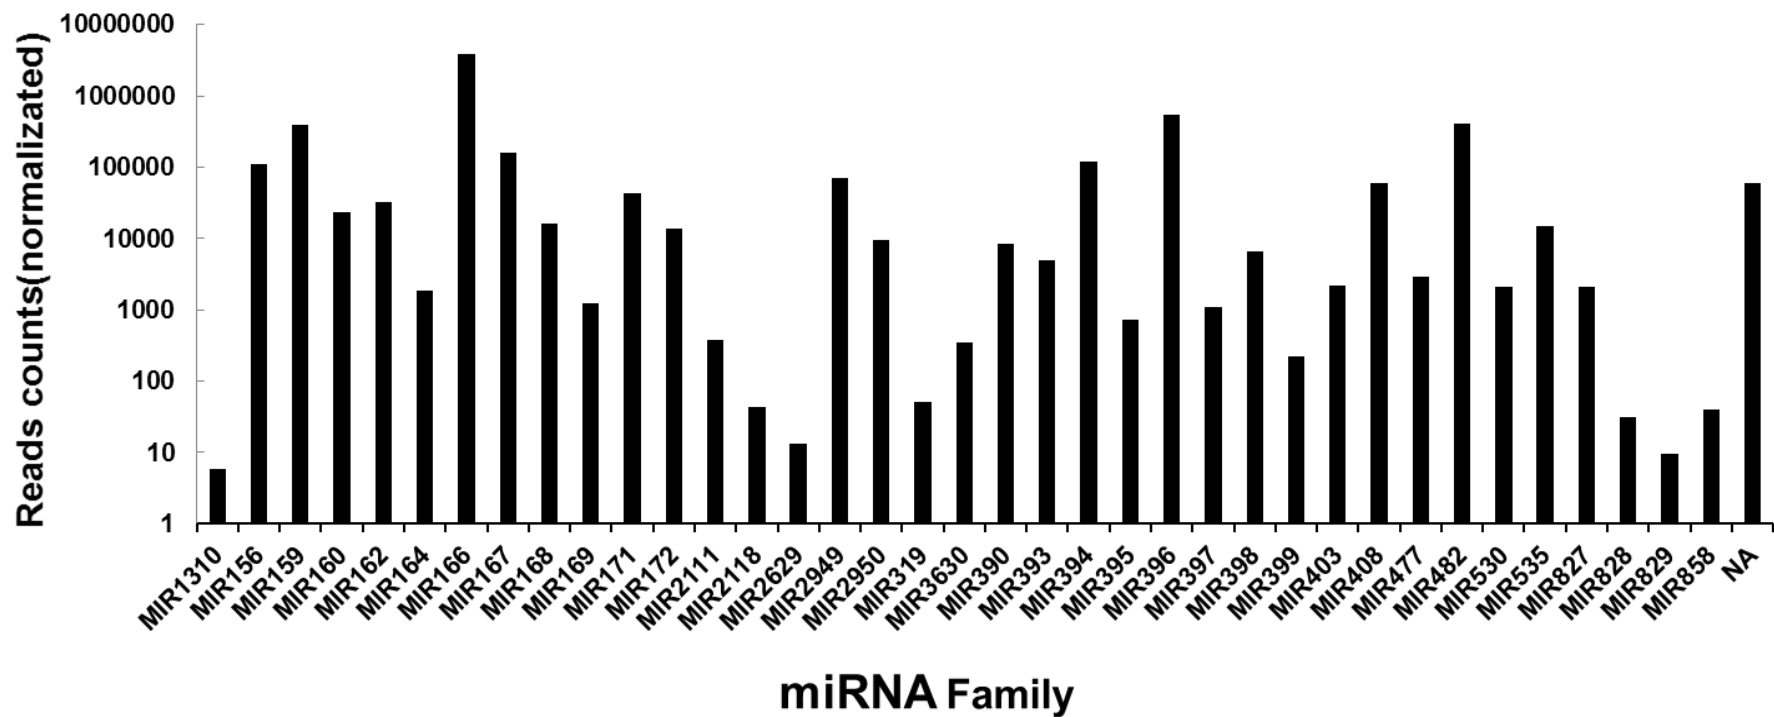

**D. Abundance of conserved miRNA families**
