# Supplementary material for: Comprehensive analysis of differentially expressed genes and transcriptional regulation induced by salt stress in two contrasting cotton genotypes
Source: PubMed Central journal article supplement (PMC4169805; doi:10.1186/1471-2164-15-760), 2014-09-05
Supplement: 12864_2014_6456_MOESM9_ESM.pdf [file 12864_2014_6456_MOESM9_ESM.pdf]

## Additional file 9

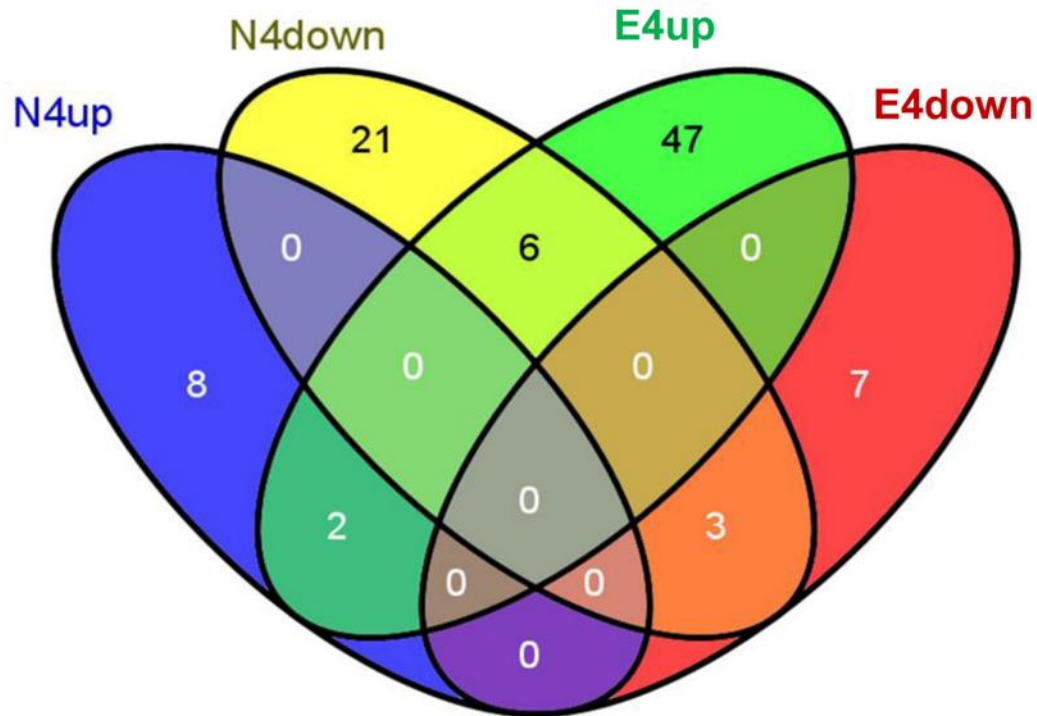

**A. Venn diagram illustrating the numbers of differently up- and down-regulated miRNAs between Nan Dan Ba Di Da Hua and Earlistaple 7 in response to salt stress at 4h**

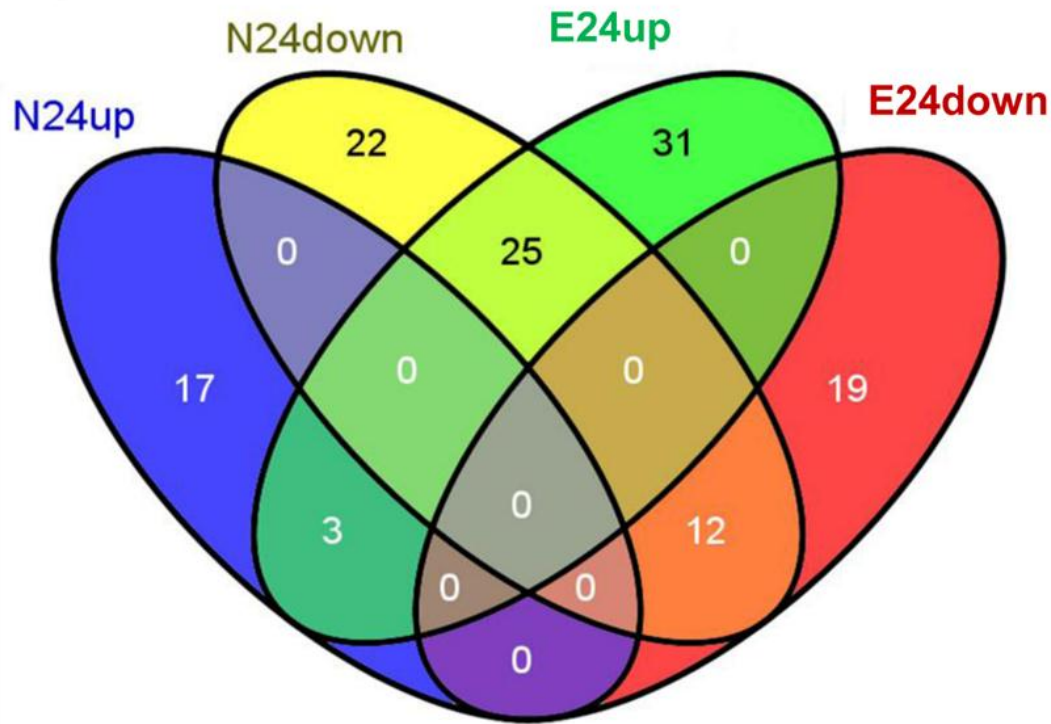

**B. Venn diagram illustrating the numbers of differently up- and down-regulated miRNAs between Nan Dan Ba Di Da Hua and Earlistaple 7 in response to salt stress at 24h**

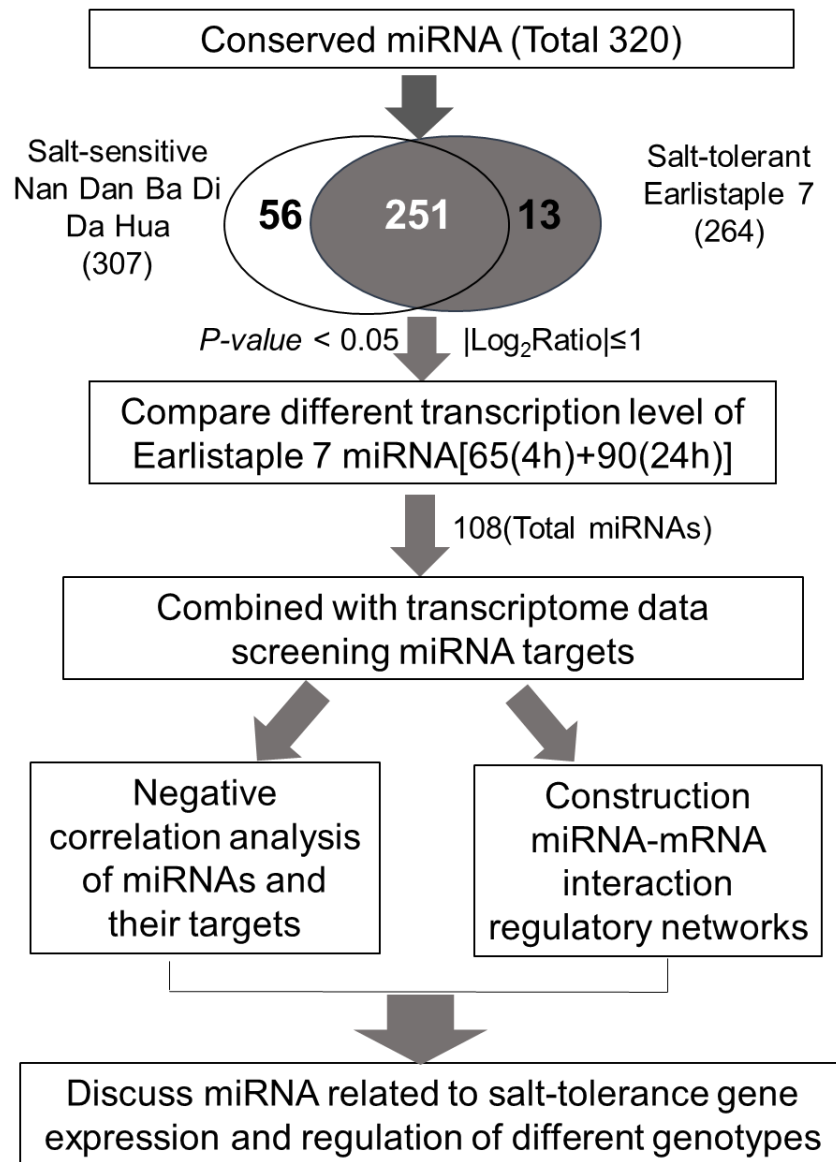

**C. Flowchart analysis of the differentially expressed miRNAs and their target genes**

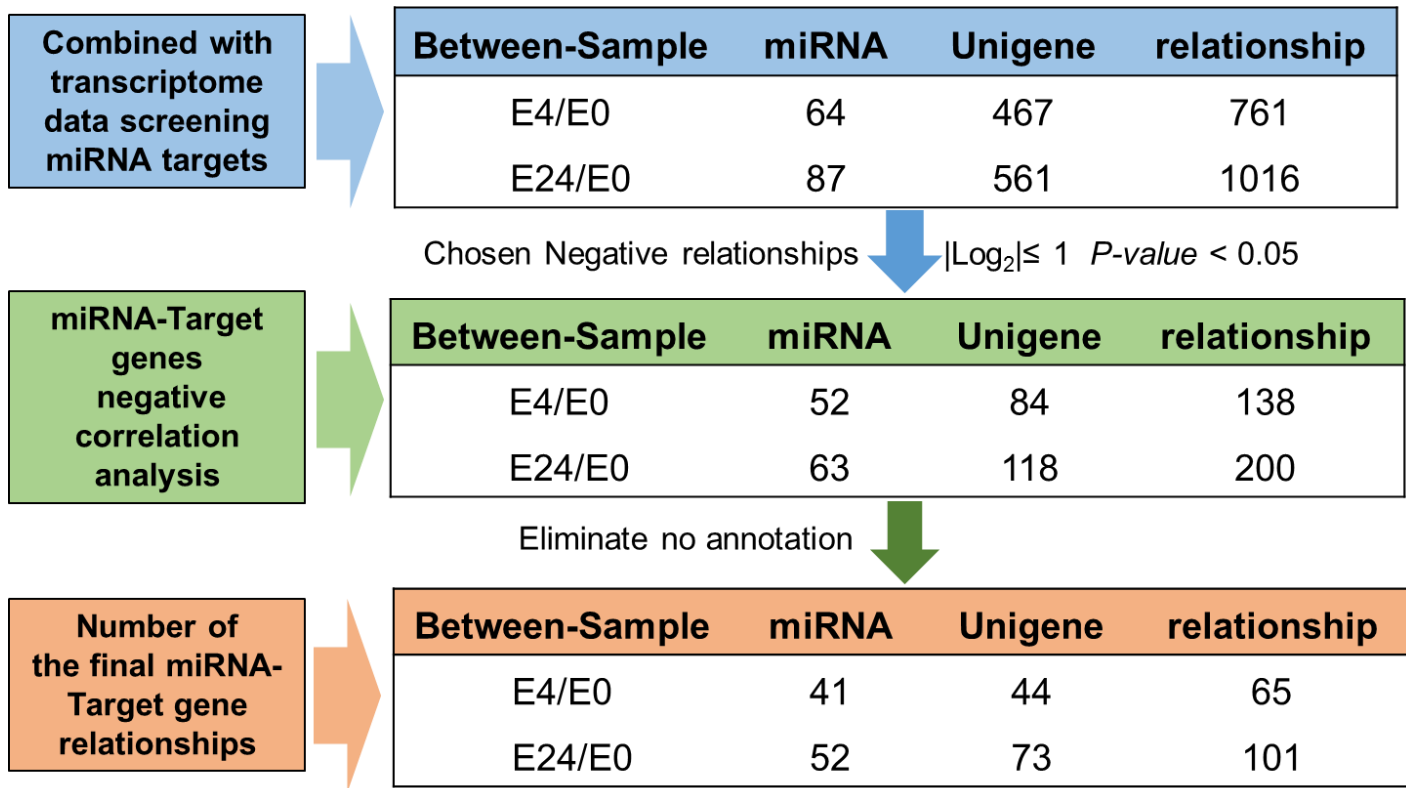

**D. Procedure for screening of negative miRNA-target unigene relationships related to salt-treatment response**

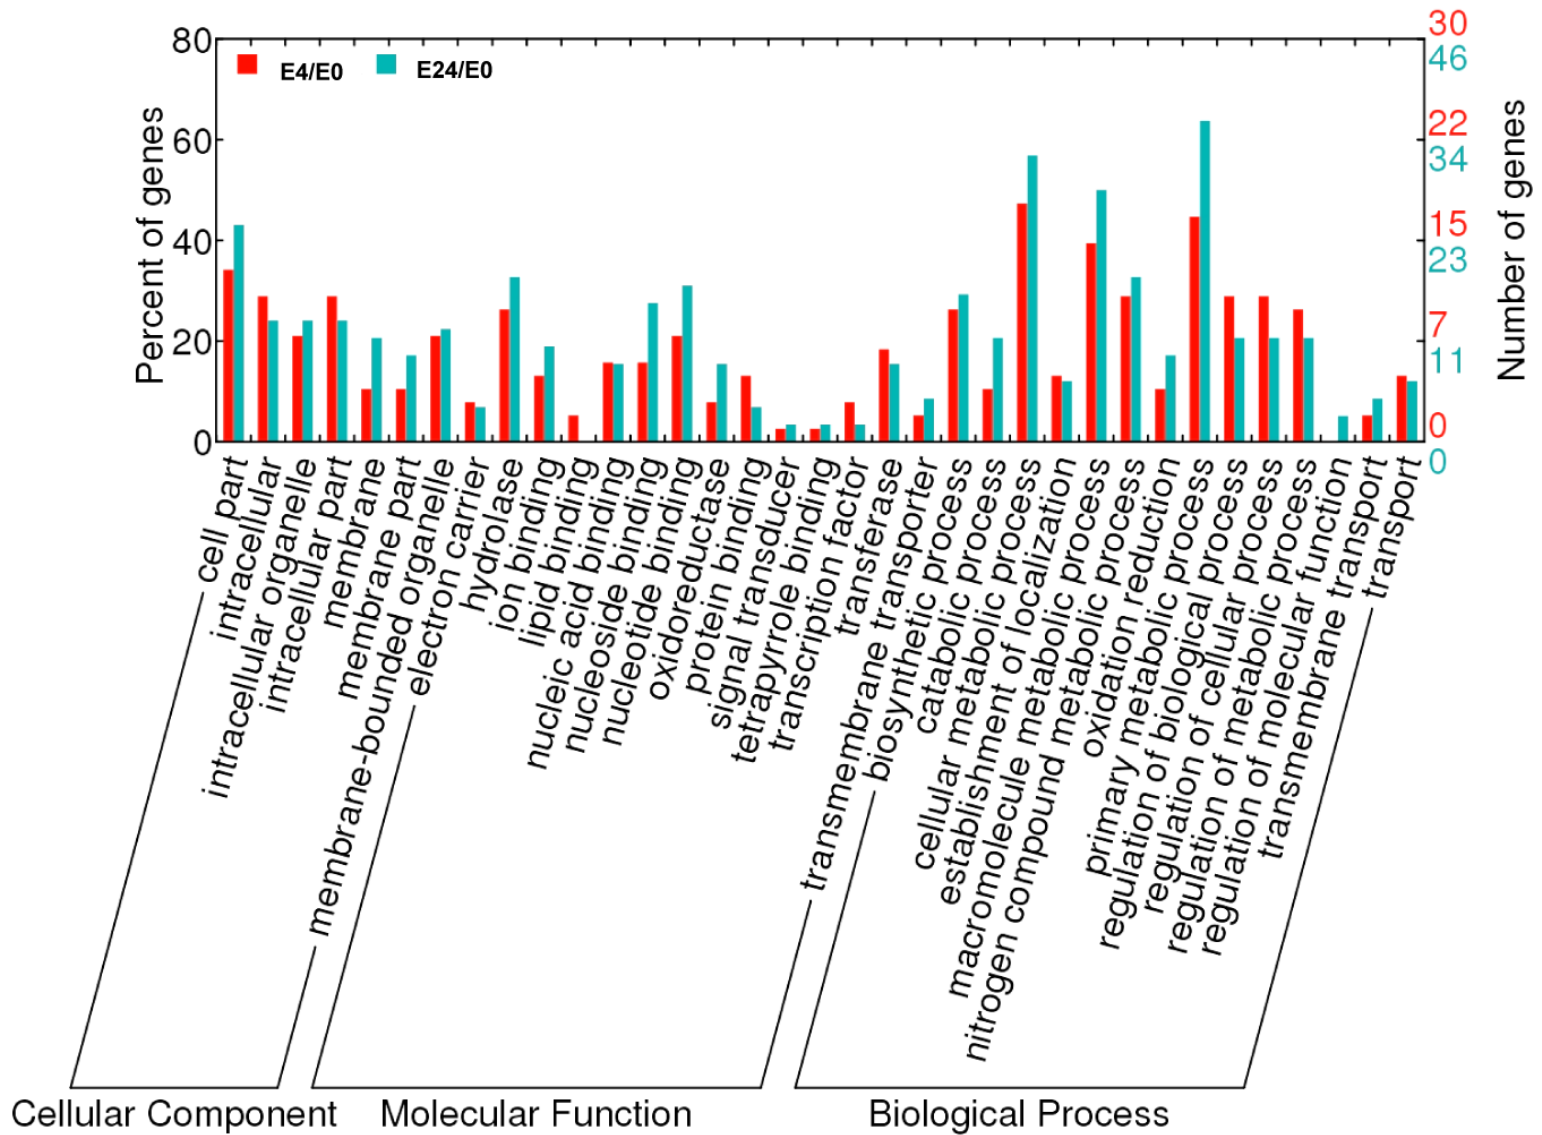

**E. Gene Ontology analysis of conserved miRNA targets identified in salt-tolerant Earlistaple 7 at 4 and 24 h of salt treatment.**
